# Supplementary figures and images for: Yap-lin28a axis targets let7-Wnt pathway to restore progenitors for initiating regeneration
Source: eLife journal article supplement (doi:10.7554/elife.55771), 2020-04-30

Fig1-figure supplement 1

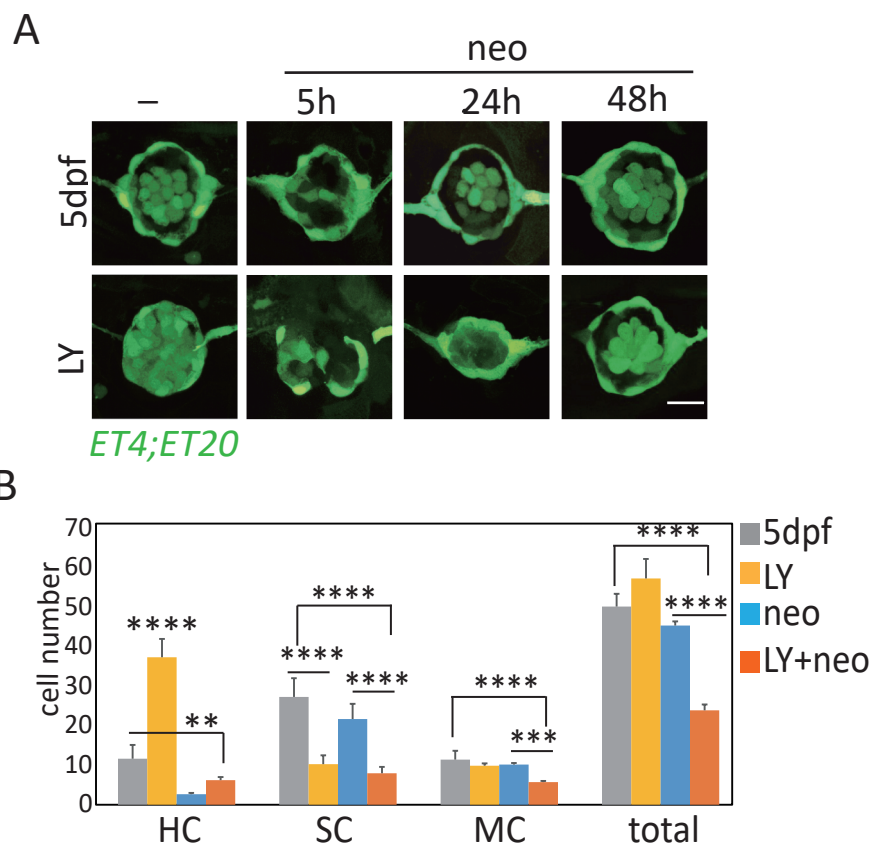

Supplement: supp [file elife-55771-supp-v1.zip]

Fig5-figure supplement 1

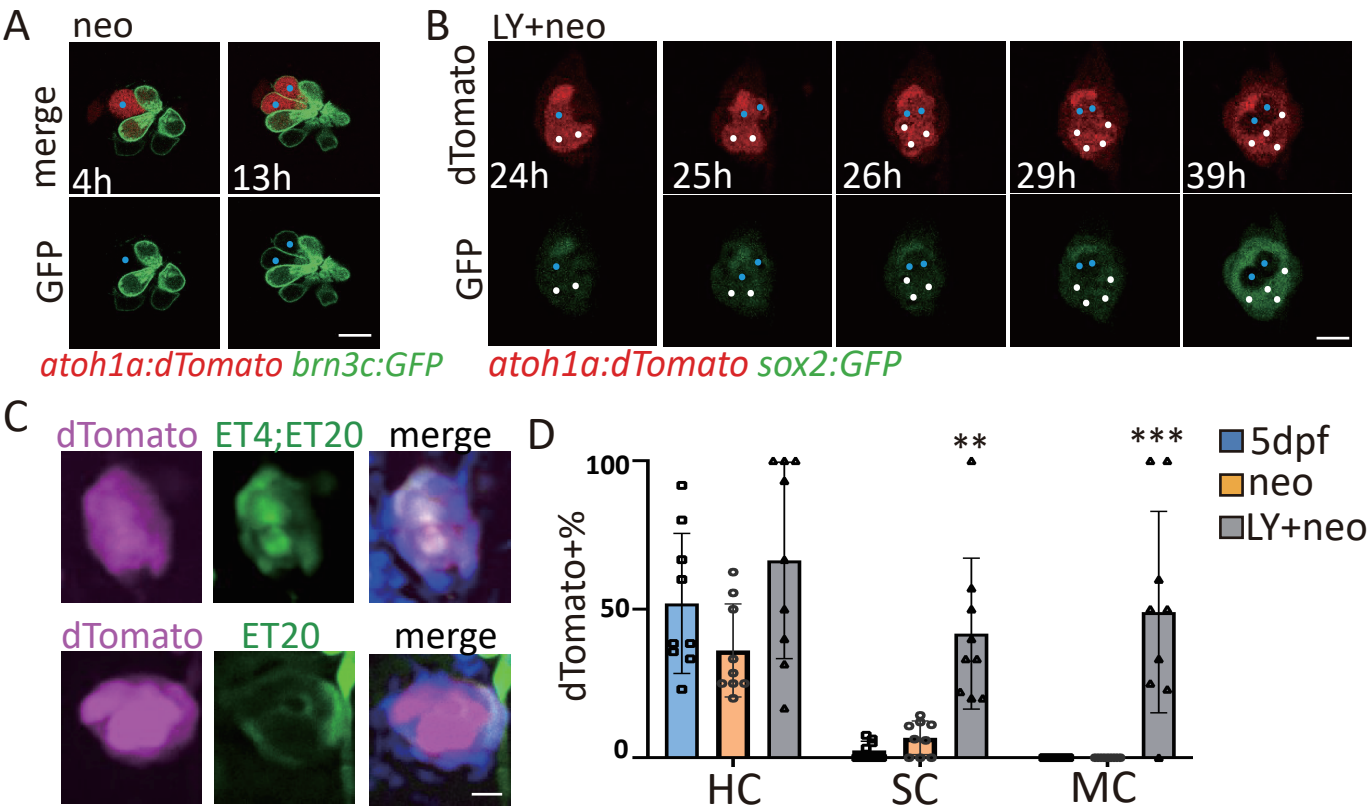

Supplement: supp [file elife-55771-supp-v1.zip]

Fig2-figure supplement 2

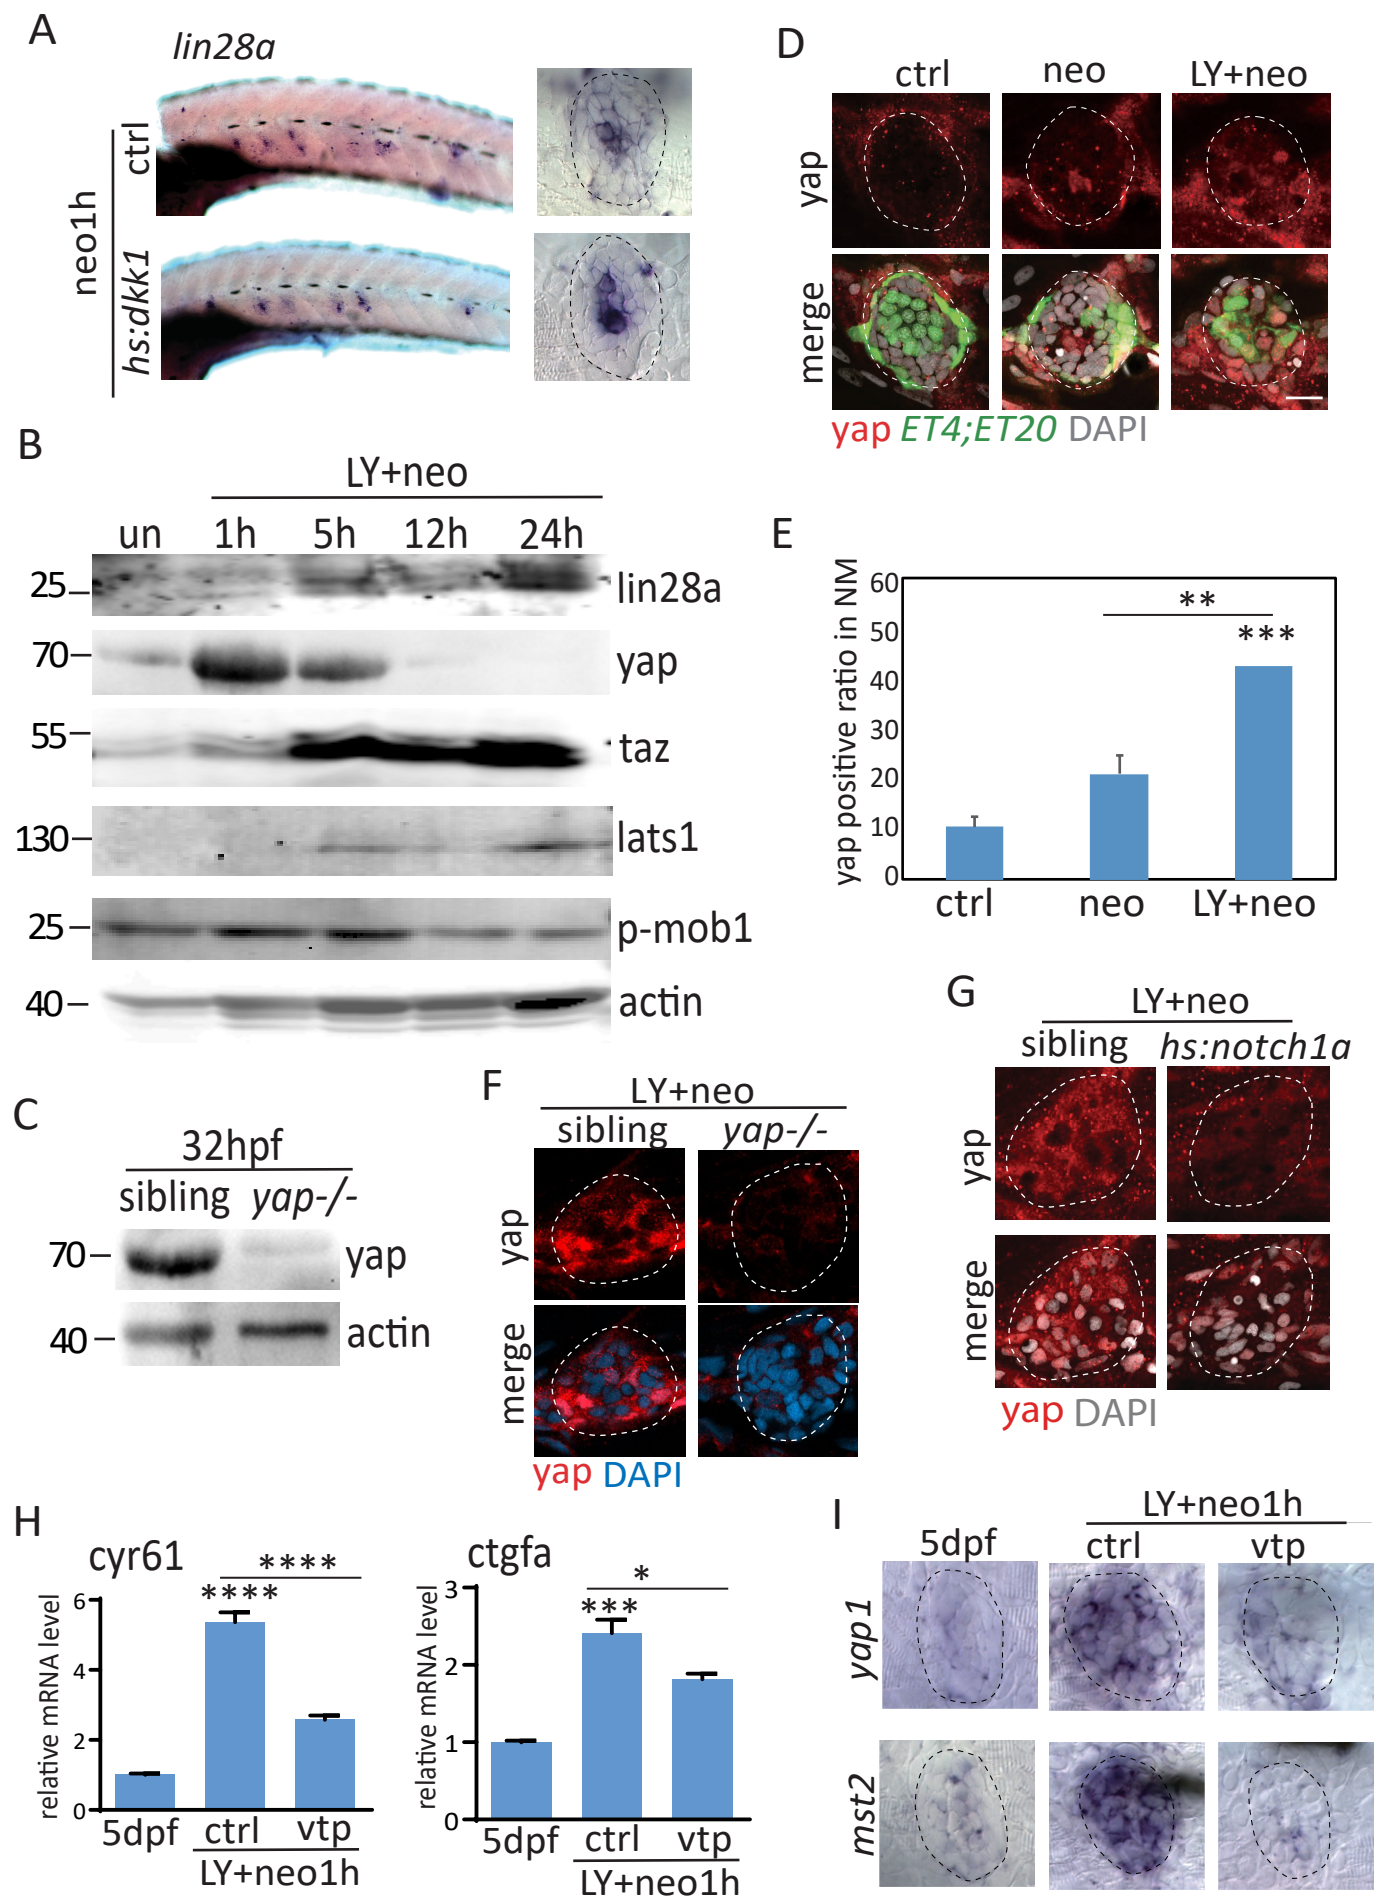

Supplement: supp [file elife-55771-supp-v1.zip]

Fig3-figure supplement 2

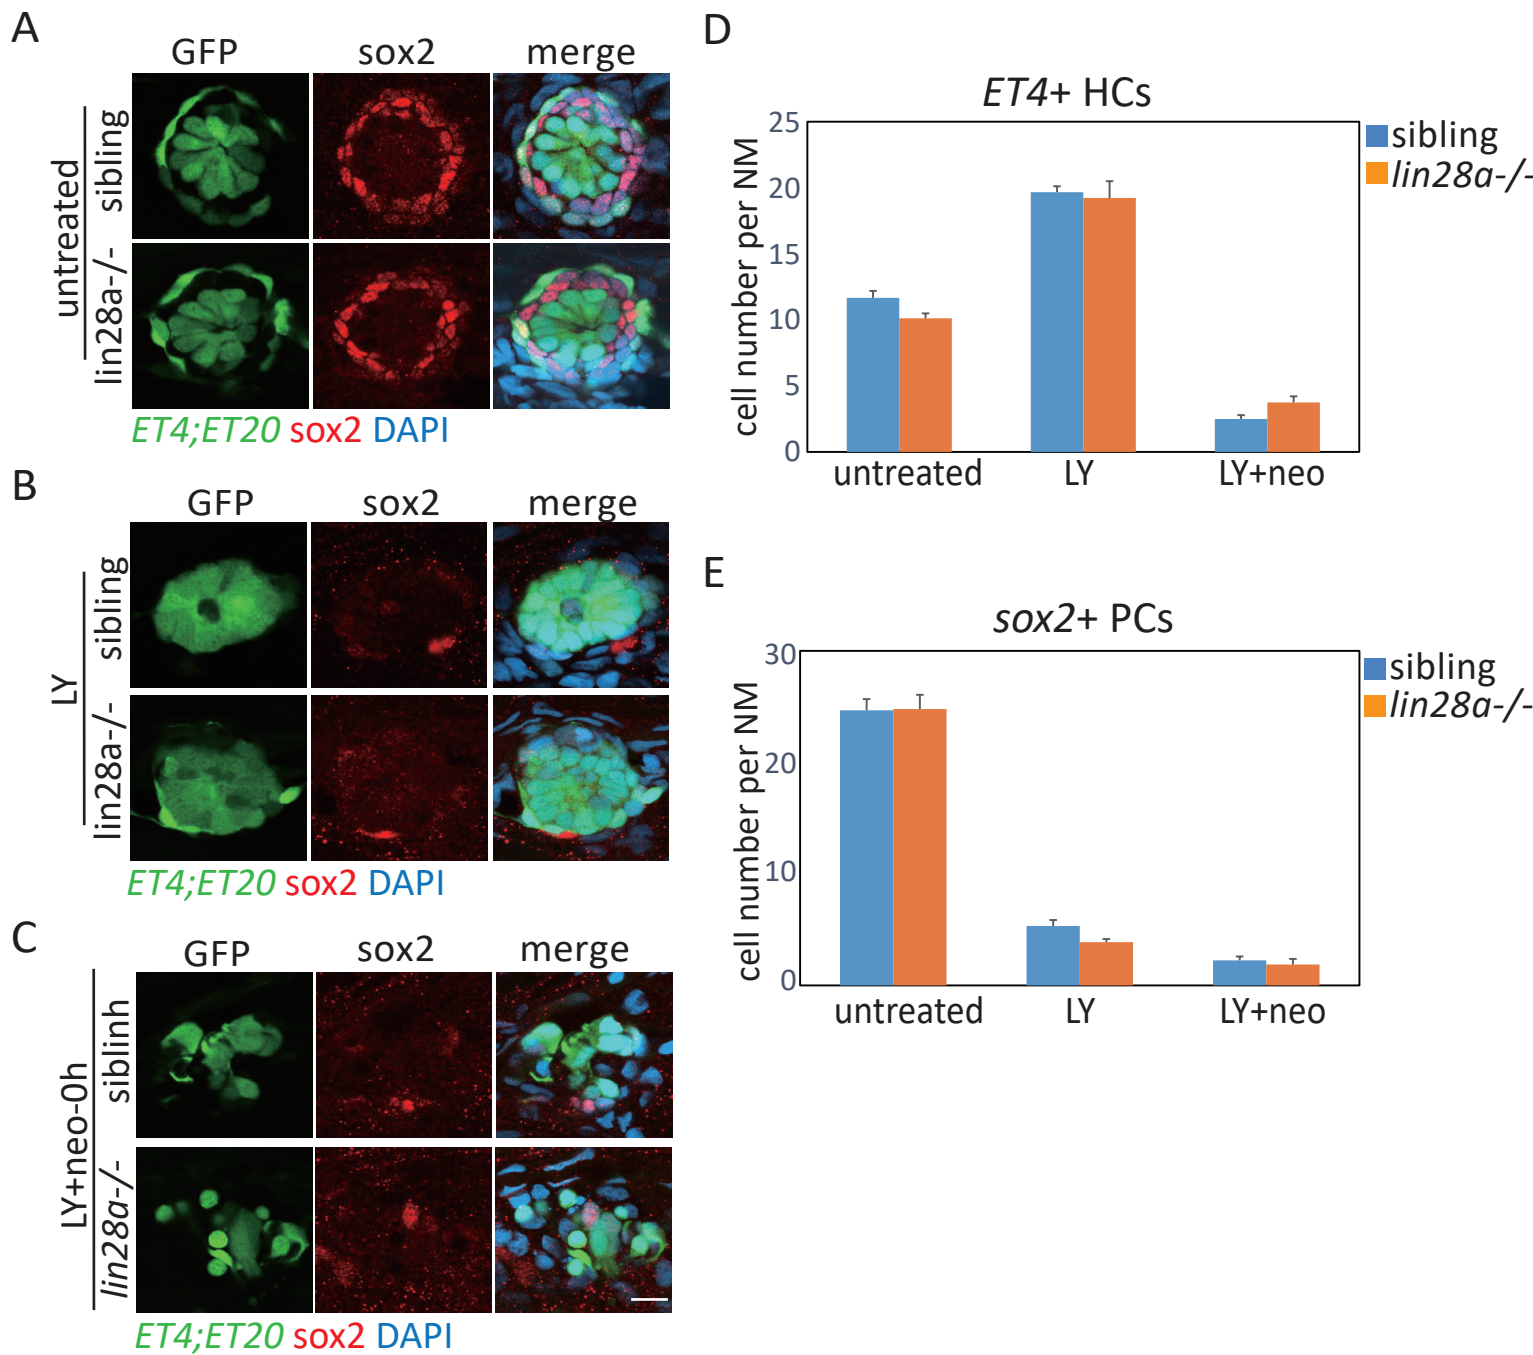

Supplement: supp [file elife-55771-supp-v1.zip]

Fig1-figure supplement 2

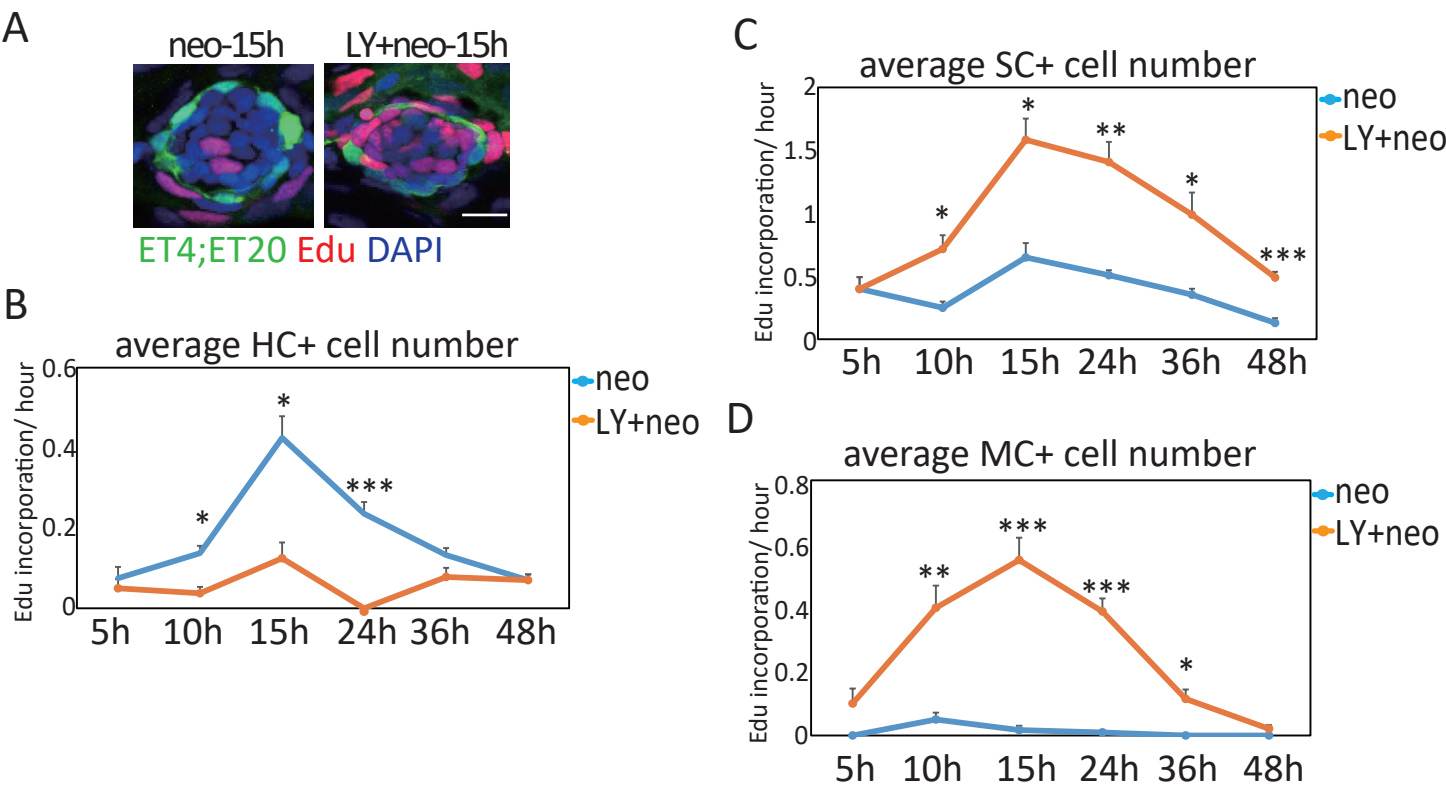

Supplement: supp [file elife-55771-supp-v1.zip]

Fig3-figure supplement 1

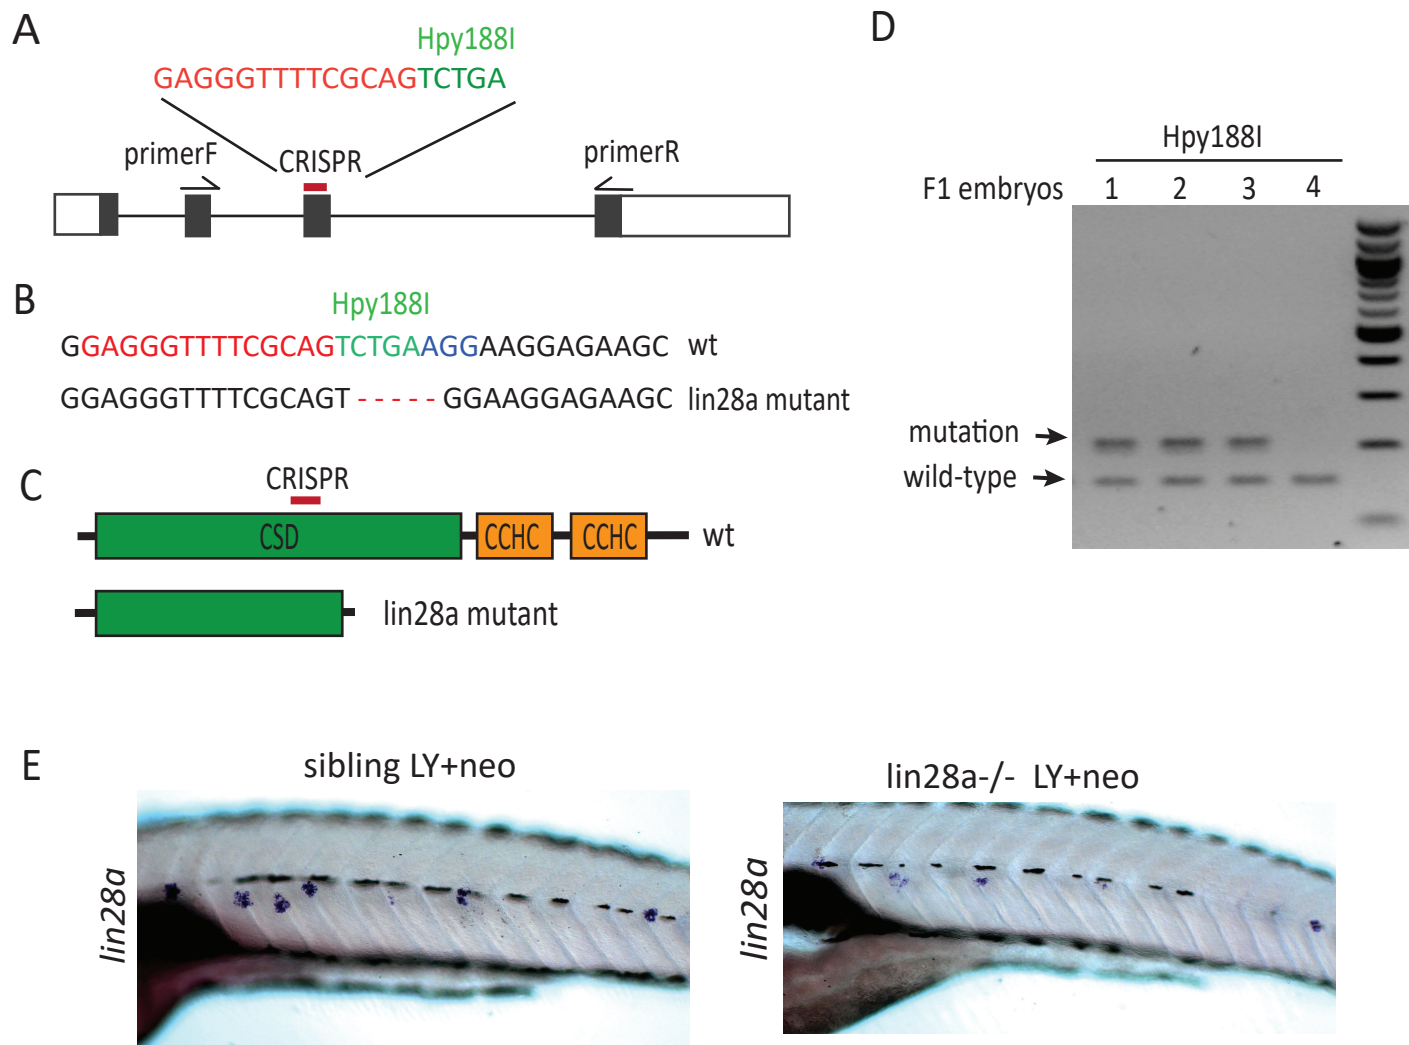

Supplement: supp [file elife-55771-supp-v1.zip]

Fig2-figure supplement 1

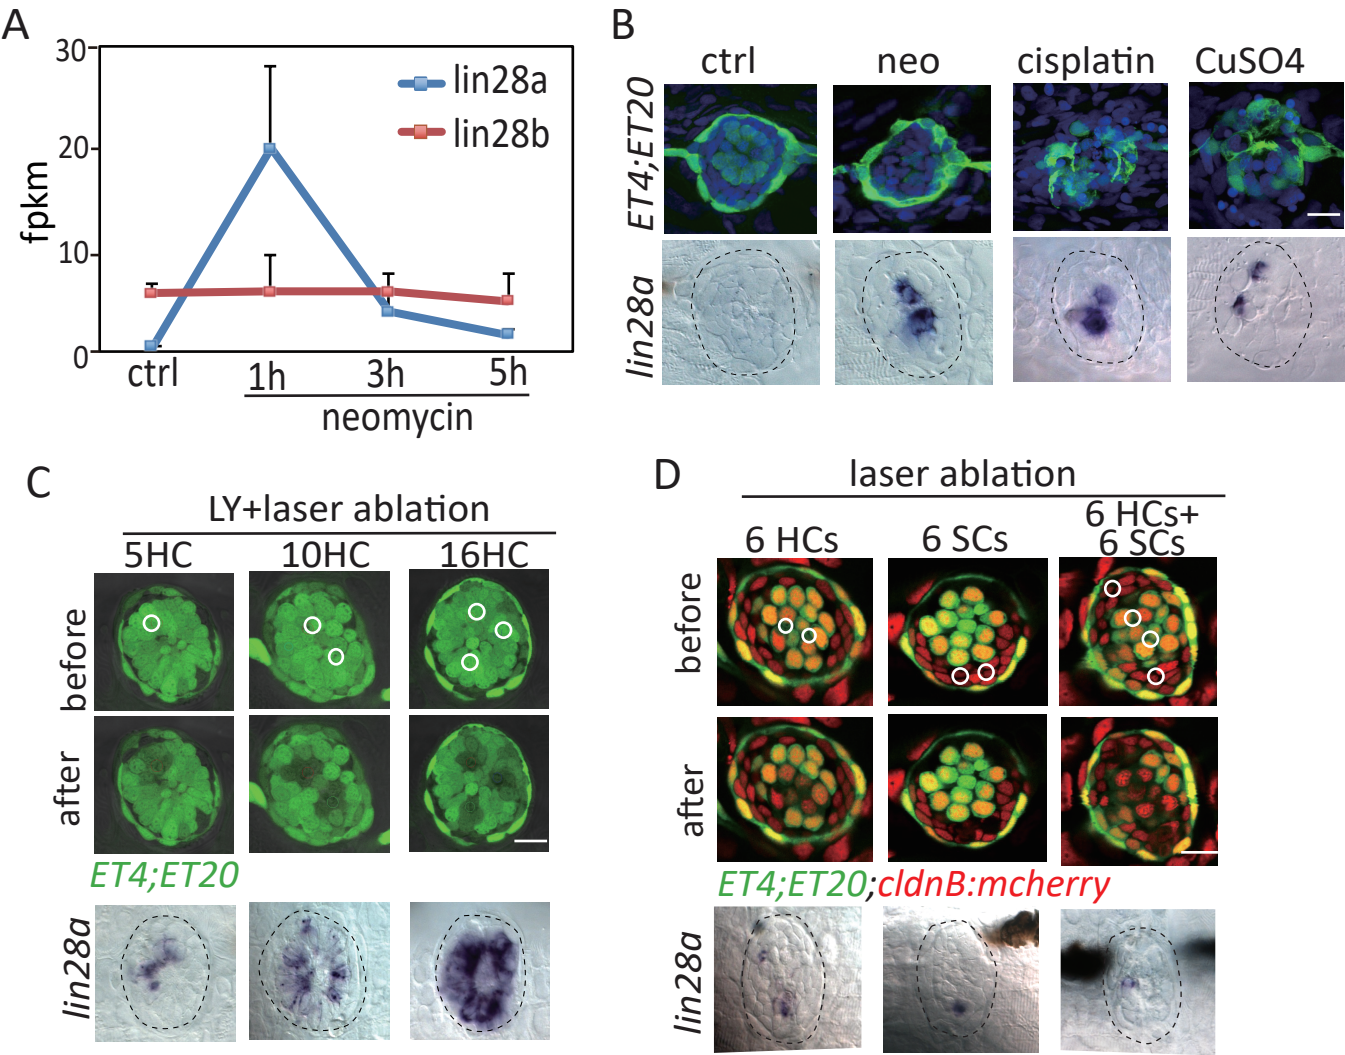

Supplement: supp [file elife-55771-supp-v1.zip]

Fig6-figure supplement 1

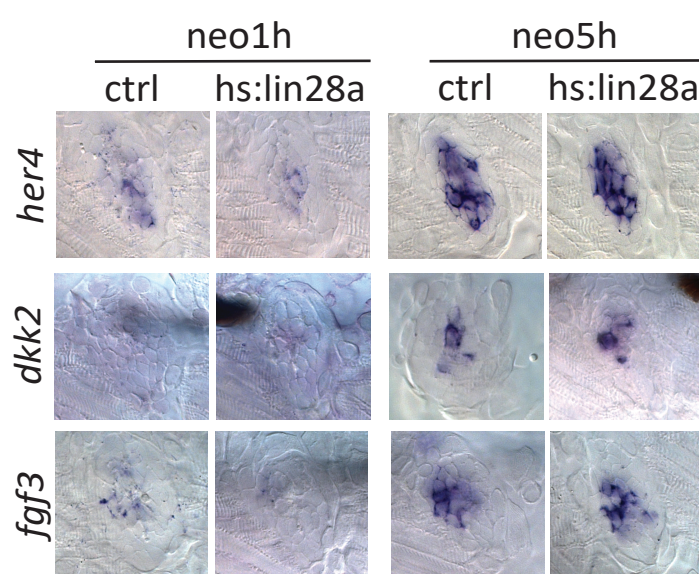

Supplement: supp [file elife-55771-supp-v1.zip]

Fig4-figure supplement 1

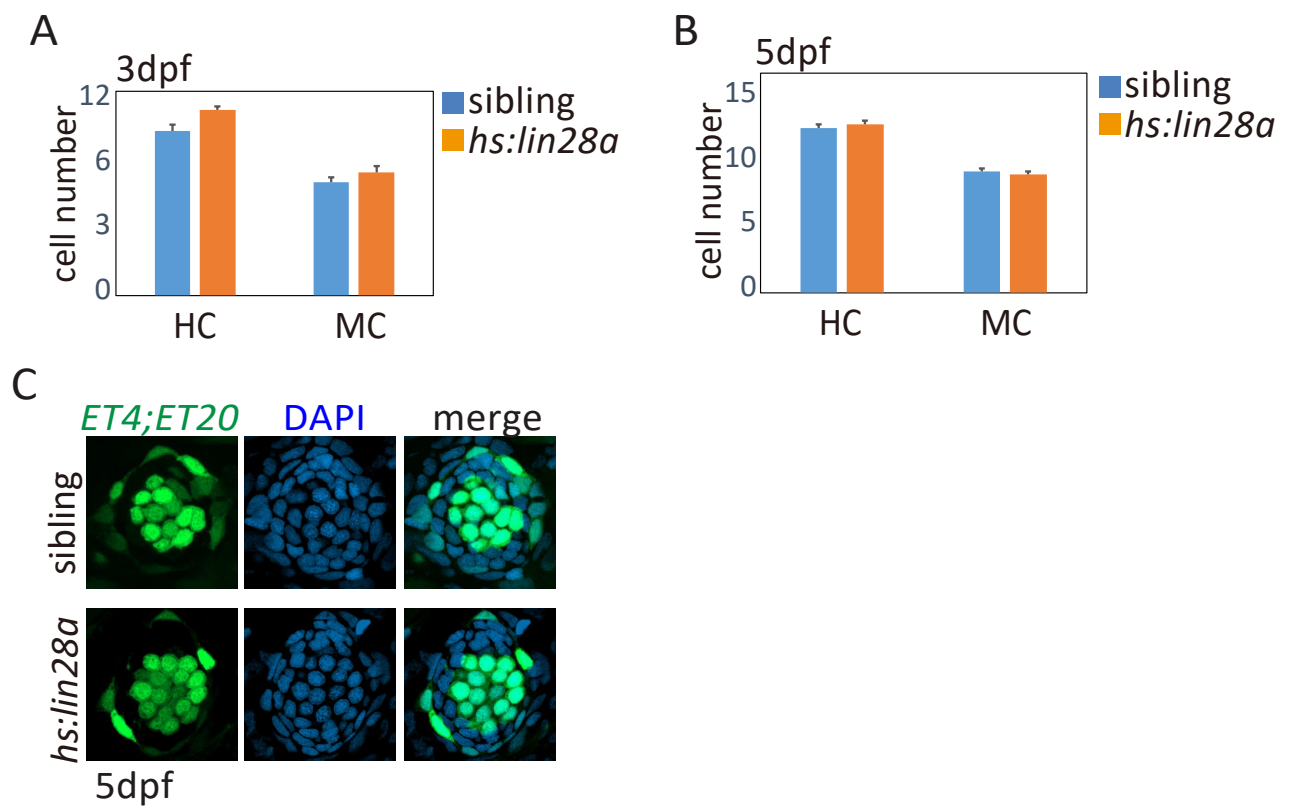

Supplement: supp [file elife-55771-supp-v1.zip]
